# Supplementary material for: Rethinking polyiodides: the role of electron-deficient multicenter bonds
Source: Royal Society of Chemistry journal article supplement (doi:10.1039/d4cc02832e), 2024-01-01
Supplement: d4cc02832e1.pdf [file d4cc02832e1.pdf]

Supplementary Information for

## Rethinking Polyiodides: The Role of Electron-Deficient Multicenter Bonds

Matteo Savastano,<sup>a\*</sup> Hussien H. Osman,<sup>b,c,d</sup> Ángel Vegas,<sup>e</sup> and Francisco Javier Manjón<sup>b\*</sup>

<sup>a</sup> Department of Human Sciences for the Promotion of Quality of Life, University San Raffaele Roma, via di Val Cannuta 247, 00166 Rome, Italy

E-mail: [matteo.savastano@uniroma5.it](mailto:matteo.savastano@uniroma5.it)

<sup>b</sup> Instituto de Diseño para la Fabricación y Producción Automatizada, MALTA Consolider Team, Universitat Politècnica de València, 46022 València, Spain

E-mail: [fjmanjon@fis.upv.es](mailto:fjmanjon@fis.upv.es)

<sup>c</sup> Departamento de Física Aplicada-ICMUV, MALTA Consolider Team, Universitat de València, Calle Dr. Moliner 50, 46100 Burjassot, Spain

<sup>d</sup> Chemistry Department, Helwan University, Ain-Helwan 11795, Cairo, Egypt

<sup>e</sup> Universidad de Burgos, Hospital del Rey, 09001 Burgos, Spain

## Details on CSD datasets for non-branched polyhalides

### Polyiodides:

- $I_3^-$ ,  $I_5^-$ ,  $I_8^{2-}$

Dataset from ref. 26 of the manuscript.

- *Heptaiodide.  $I_7^-$ :*

19 entries from 15 CSD refcodes:

BABTIL; GOBFUY; JAPRUO; OFEDUY; ONOCOM; RECLAM; SOCWAK; WAQVUH; WERBUQ; XAGJUM; XEHQUW; YUPXOY; ZIVXUX; ONIRIP; XEKWET.

- *Tetraiodide dianion,  $I_4^{2-}$ :*

30 entries from 28 CSD refcodes:

BOPDUF; CENTEW; CENTIA; CENTOG; CENTUM; CEWMIA; FEBZOD; FECBEW; JOPKOQ; LAGFEG; LAGFOQ; NABWOD; NABWOD01; ONUNOB; OZEGEH; PUSYEI; SAZZEA; SIWYON; SOCVOX; TAVXOD; TIRBEB01; TOKZOK; XUBMEP; YEWKUG; YICJAX; YICJAX01; YIRLOA; YONKET;

### Other polyhalides:

- *Homotrihalides*

- Trichloride,  $Cl_3^-$

9 entries from 9 CSD refcodes:

CUPTIQ; CUPTIQ10; DEGLIK; FAHXIZ; FAHXOF; FAHXUL; PHASCL; UHUQAP; ZEHTIP

- Tribromide:  $Br_3^-$

345 entries from 274 CSD refcodes:

PAJSEC; WAWQEU; AFAYAI; AKIMOX; ALAZIY; APTHCB; ARESOI; ARESUO; ARETAV; ARETEZ; ARETID; ARETOJ; ARETUP; AZAXAD; AZEKEW; AZEKEW01; BADBEQ; BAFTOT; BEFWAM; BEGJEF; BEGJEF01; BEGJII; BEGJOP; BEGJUV; BEGKEG; BEMLIO; BEMYAW; BEMYEA; BEPZEB; BEPZEB01; BIMPAO; BMOPHX; BUJBOZ; BULLOL; BULLUR; BZDZTB; CALSEN; CAZPUR; CITKOI; CITTEH; CITVAF; CIWYOW; COCGAF; COVSUB; COVSUB10; CUBDIP; CUBRAS; DAHGUO; DAHGUO01; DAKVUG; DEPNUJ; DEQXOP; DESNEX; DESNUN; DESPAV; DIXTIP; DIZDUL; DOSRUB; DUSGED; DUXKOW; DUXKUC; EKOPOL; EPERAV; EQIVEH; ETEVIL; ETEVUX; ETOXUI; ETOYET; FAJHUT; FASYAZ; FOGWON; FOGYAB; FOHDAH; FUNNEJ; FUNNIN; FURTOE; GOBCIM; GUVKEP; HADLII; HAGNIN; HANYAZ; HAZWEM; HEJNIT; HIFWIF; HIFWOL; HIFXAY; HIPVIM; HISZUE; HOJMAU; HUBGIX; ICOVIG; ICOVUS; ITUZON; IXOMOZ; IXUMUJ; IYEVAL; JAWBOY; JENGIV; JEPGUG; JEPGUG01; JEXZIY; JOKJUQ; JOXGIO; KACWER; KAHZAV; KOHQOQ; KOZVIH; KOZVON; KUKSEP; KUKSIT; LACTOC; LACTUI; LAGGEH; LAHCUW; LIFBEH; LIFZAC; LODJAR; LUXBAJ; MEGDAG; MIVJUW; MOHMIF;

MOXFUD; MPYBAN; MUXVIK; NEGXII; NEGXOO; NEGXUU; NEGYAB; NEGYEF; NEGYIJ;  
NEQTOU; NOFYUC; NUNYOK; ODAWIB; ODMNBR; OFOXUD; OFOYAK; OJORUB; OLIHID;  
OQUYAB; PAKBAH; PAQRUX; PASOHB; PICSBB; PITLLEL; POPWEZ; POYXIN; POYXOT;  
POYXUZ; PUKWUO; PUQNEW; QAKZOV; QALVEH; QELPAY; QIFDOB; QIVHIP; QIXCIK;  
QORMAO; QORMIW; QORMOC; QQQALJ01; QULTOG; QULTOG01; QUMSBR; QUWBUG;  
RAQGIB; RECMET; RECMIX; RECMOD; REJTUY; REKBEO; REKBIS; RIBWAC; RIHJEA; RIKZEQ;  
ROTCOV; RUGGEI; RUKFEI; RUTLUQ; SAMDUF; SAMFAN; SAQVAI; SEGMOG; SEGMOG01;  
SIVHAJ; SIVHEN; SIVHIR; SIVHOX; SIVHUD; SIVJAL; SIVJEP; SIVJIT; SUHJIO; SUPVOQ;  
TAYTUJ; TEHRUT; TIWFIO; TIYRUP; TOYZOZ; TOZLAV; TOZLID; TPASTB; TPASTB01; TUFTRUK;  
TUMHUE; UKACUF; UKADAM; UKAGOD; URESES; URUBIT; UWANOW; UWOVOT; UYUTEQ;  
VAGNUN; VAVTES; VIKHON; VOJTAS; VUSFOE; WADJAJ; WADSIH; WARMIN; WARMOT;  
WATHOR; WATJOS; WATJUY; WOBDID; WODWUK; WULDAJ; XAJZIT; XAXGUY; XAXHAF;  
XEHJIE; XEWVEB; XIQTIB; XODKAC; XOWZIT; XURGEW; YAMJII; YAMJOP; YAMJUV; YAMKAC;  
YESGUY; YIZCAL; YODZEW; YOFLUD; YOFMEO; YOJDAD; YOPDOY; YOTMOK01; YOZNIN;  
YUVXUL; YUZDIJ; ZOZFIG; BAVYAC; XALFAV; BEQKIV; DEHVEV; MESPEJ; WETKUF.

- *Heterotrihalides:*

- $\text{FClF}^-$   
1 entry from 1 CSD refcode: NUSGAM
- $\text{FBrF}^-$   
1 entry from 1 CSD refcode: QAKZEL
- $\text{ClBrCl}^-$   
8 entries from 8 CSD refcodes:  
GOLKAV; MURREZ; MURRID; SAFGIT; SUPTON; TEACBR; TEACBR01; TEACBR02;
- $\text{ClBrBr}^-$   
2 entries from 2 CSD refcodes: MURRUP; URUBUF

- *Tetrahalides*

- Tetrabromide dianion,  $\text{Br}_4^{2-}$   
3 entries from 3 CSD refcodes: FENBOQ; FIMDOU; TUMHOY

- *Pentahalides*

- *Pentabromide,  $\text{Br}_5^-$*   
6 entries from 6 CSD refcodes: CITTIL; HIFWUR; MURRUP; QAJJIY; RECMET; WEDDAO

- ClBrClBrCl<sup>-</sup>  
3 entries from 3 reftypes: GABDOG; SAFGEP; SAFGIT

- *Hexahalides*

None.

The search actually returns the FIDBOM crystal structure, containing two head-to-tail “bonded” Br<sub>3</sub><sup>-</sup> anions in the shape of an L. The “bond” (“bond” length 3.593(1), i.e. close to sum of VdW radii), however, does not appear tight enough to significantly differ from a mere van der Waals contact and has therefore been excluded.

- *Heptahalides*

None.

Some branched (pyramidal) species are found instead, CSD reftypes: DIDHUW ((ClBr)<sub>3</sub>Cl<sup>-</sup>), ORUKUK ((FCl)<sub>3</sub>F<sup>-</sup>), QIFDIV (Br<sub>7</sub><sup>-</sup>), QIFDUH (Br<sub>7</sub><sup>-</sup>), SAFFUE ((ClBr)<sub>3</sub>Cl<sup>-</sup>).

- *Octahalides*

- Octachloride dianion, Cl<sub>8</sub><sup>2-</sup>:  
1 entry from 1 CSD reftype: ESAYEE
- Octabromide dianion, Br<sub>8</sub><sup>2-</sup>:  
2 entries from 2 CSD reftypes: PAQSAE; REKBAK
